# Supplementary material
Source: PubMed Central journal article supplement (PMC10134040)
Supplement: jamasurg-e230662-s003.pdf [file jamasurg-e230662-s003.pdf]

\*Indicates required information. Only first name, last name, and suffix will appear in PubMed.

| <b>*Group Name(s): Grupo Español de Carcinomatosis Peritoneal</b> |                    |                              |                  |                                                                                        |                                          |                                                         |                                                                                            |
|-------------------------------------------------------------------|--------------------|------------------------------|------------------|----------------------------------------------------------------------------------------|------------------------------------------|---------------------------------------------------------|--------------------------------------------------------------------------------------------|
| <b>*First Name and Middle Initial(s)</b>                          | <b>*Last Name</b>  | <b>*Suffix (eg, Jr, III)</b> | Academic Degrees | Institution                                                                            | Location (city, state/province, country) | Role or Contribution, eg, chair, principal investigator | Group (if more than 1 Group listed in the byline) and/or Subgroup (eg, Steering Committee) |
| Miguel A.                                                         | Lorenzo Liñán      |                              | MD, PhD          | Unit of Surgery, Hospital de Torrecárdenas                                             | Almería, Spain                           |                                                         |                                                                                            |
| Isabel M.                                                         | Gallarín Salamanca |                              | MD, PhD          | Unit of Surgery, Hospital University Infanta Cristina                                  | Badajoz, Spain                           |                                                         |                                                                                            |
| Marta                                                             | González Cordero   |                              | MD               | Unit of Surgery, Hospital University Infanta Cristina                                  | Badajoz, Spain                           |                                                         |                                                                                            |
| Isabel                                                            | Ramos              |                              | MD, PhD          | Unit of Surgery, Consorci Sanitari Integral, Hospital de Sant Joan Despí Moises Broggi | Barcelona, Spain                         |                                                         |                                                                                            |
| Oriol                                                             | Crusellas Maña     |                              | MD, PhD          | Unit of Surgery, Consorci Sanitari Integral, Hospital de Sant Joan Despí Moises Broggi | Barcelona, Spain                         |                                                         |                                                                                            |
| Araceli                                                           | Mayol Oltra        |                              | MD               | Unit of Surgery, Hospital Provincial Castellón                                         | Castellón, Spain                         |                                                         |                                                                                            |
| Melissa                                                           | Granados Rodríguez |                              | PhD student      | Maimonides Institute of Biomedical Research of Córdoba, IMIBIC                         | Córdoba, Spain                           |                                                         |                                                                                            |
| Mari C.                                                           | Vázquez Borrego    |                              | PhD              | Maimonides Institute of Biomedical Research of Córdoba, IMIBIC                         | Córdoba, Spain                           |                                                         |                                                                                            |
| Auxiliadora                                                       | Gómez España       |                              | MD               | Unit of Medical Oncology, University Hospital Reina Sofia                              | Córdoba, Spain                           |                                                         |                                                                                            |
| Rosa M.                                                           | Ortega Salas       |                              | MD, PhD          | Unit of Pathology, University Hospital Reina Sofia                                     | Córdoba, Spain                           |                                                         |                                                                                            |
| Ana                                                               | Martínez López     |                              | MD               | Unit of Pathology, University Hospital Reina Sofia                                     | Córdoba, Spain                           |                                                         |                                                                                            |
| Carlos                                                            | Villar             |                              | MD               | Unit of Pathology, University Hospital Reina Sofia                                     | Córdoba, Spain                           |                                                         |                                                                                            |

## Supplemental Online Content: Nonauthor Collaborators

\*Indicates required information. Only first name, last name, and suffix will appear in PubMed.

| *First Name and Middle Initial(s) | *Last Name               | *Suffix (eg, Jr, III) | Academic Degrees | Institution                                                                             | Location (city, state/province, country) | Role or Contribution, eg, chair, principal investigator | Group (if more than 1 Group listed in the byline) and/or Subgroup (eg, Steering Committee) |
|-----------------------------------|--------------------------|-----------------------|------------------|-----------------------------------------------------------------------------------------|------------------------------------------|---------------------------------------------------------|--------------------------------------------------------------------------------------------|
| Cruces                            | Garzas Martín de Almagro |                       | MD               | Unit of Pharmacy, University Hospital Reina Sofia                                       | Córdoba, Spain                           |                                                         |                                                                                            |
| Francisco                         | Triviño Tarradas         |                       | MD               | Unit of Radiology, University Hospital Reina Sofia                                      | Córdoba, Spain                           |                                                         |                                                                                            |
| Eva M.                            | Torres Tordera           |                       | MD, PhD          | Unit of Surgery, University Hospital Reina Sofia                                        | Córdoba, Spain                           |                                                         |                                                                                            |
| Blanca                            | Rufián Andujar           |                       | MD               | Unit of Surgery, University Hospital Reina Sofia                                        | Córdoba, Spain                           |                                                         |                                                                                            |
| Francisca                         | Valenzuela Molina        |                       | MD               | Unit of Surgery, University Hospital Reina Sofia                                        | Córdoba, Spain                           |                                                         |                                                                                            |
| Antonio                           | Gordon Suarez            |                       | MD               | Unit of Surgery, University Hospital Reina Sofia                                        | Córdoba, Spain                           |                                                         |                                                                                            |
| Francisco J.                      | Medina Fernández         |                       | MD, PhD          | Unit of Surgery, University Hospital Reina Sofia                                        | Córdoba, Spain                           |                                                         |                                                                                            |
| Manuel                            | Diéz Alonso              |                       | MD, PhD          | Unit of Coloproctology, Surgery Department, Hospital Príncipe de Asturias               | Alcalá de Henares, Madrid, Spain         |                                                         |                                                                                            |
| Pilar                             | Hernández Juara          |                       | MD, PhD          | Unit of Coloproctology, Surgery Department, Hospital Príncipe de Asturias               | Alcalá de Henares, Madrid, Spain         |                                                         |                                                                                            |
| Raquel                            | Molina Villaverde        |                       | MD, PhD          | Unit of Oncology, Surgery Department, Hospital Príncipe de Asturias                     | Alcalá de Henares, Madrid, Spain         |                                                         |                                                                                            |
| Carolina                          | Castillo Torres          |                       | MD               | Unit of Pathology, Hospital Príncipe de Asturias                                        | Alcalá de Henares, Madrid, Spain         |                                                         |                                                                                            |
| Jose I.                           | Busteros Moraza          |                       | MD, PhD          | Unit of Pathology, Hospital Príncipe de Asturias                                        | Alcalá de Henares, Madrid, Spain         |                                                         |                                                                                            |
| Inmaculada                        | Lasa Unzué               |                       | MD, PhD          | Unit of Peritoneal Oncologic Surgery, Surgery Department, Hospital Príncipe de Asturias | Alcalá de Henares, Madrid, Spain         |                                                         |                                                                                            |

## Supplemental Online Content: Nonauthor Collaborators

\*Indicates required information. Only first name, last name, and suffix will appear in PubMed.

| *First Name and Middle Initial(s) | *Last Name        | *Suffix (eg, Jr, III) | Academic Degrees | Institution                                                                                                                                                       | Location (city, state/province, country) | Role or Contribution, eg, chair, principal investigator | Group (if more than 1 Group listed in the byline) and/or Subgroup (eg, Steering Committee) |
|-----------------------------------|-------------------|-----------------------|------------------|-------------------------------------------------------------------------------------------------------------------------------------------------------------------|------------------------------------------|---------------------------------------------------------|--------------------------------------------------------------------------------------------|
| Remedios                          | Gómez Sanz        |                       | MD, PhD          | Unit of Peritoneal Oncologic Surgery, Surgery Department, Hospital Príncipe de Asturias                                                                           | Alcalá de Henares, Madrid, Spain         |                                                         |                                                                                            |
| Alberto                           | López García      |                       | MD               | Unit of Peritoneal Oncologic Surgery, Surgery Department, Hospital Príncipe de Asturias                                                                           | Alcalá de Henares, Madrid, Spain         |                                                         |                                                                                            |
| María A.                          | Heras Garceau     |                       | MD               | Digestive Surgery, Prof. University Autónoma Madrid, Hospital La Paz                                                                                              | Madrid, Spain                            |                                                         |                                                                                            |
| Ángel                             | Serrano del Moral |                       | MD, PhD          | Surgical Oncology, Hospital University of Fuenlabrada                                                                                                             | Madrid, Spain                            |                                                         |                                                                                            |
| Israel                            | Manzanedo         |                       | MD, PhD          | Surgical Oncology, Hospital University of Fuenlabrada                                                                                                             | Madrid, Spain                            |                                                         |                                                                                            |
| Fernando                          | Pereira           |                       | MD, PhD          | Surgical Oncology, Hospital University of Fuenlabrada                                                                                                             | Madrid, Spain                            |                                                         |                                                                                            |
| Santiago                          | González Moreno   |                       | MD, PhD          | MD Anderson Cancer Center                                                                                                                                         | Madrid, Spain                            |                                                         |                                                                                            |
| Alberto                           | Titos García      |                       | MD, PhD          | Peritoneal Oncology Surgery Division Trauma and Emergency Surgery Division General, Digestive and Transplantation Surgery Department University Regional Hospital | Málaga, Spain                            |                                                         |                                                                                            |
| Pedro A.                          | Parra Baños       |                       | MD               | Unit of Oncologic Surgery, University General Hospital Reina Sofia                                                                                                | Murcia, Spain                            |                                                         |                                                                                            |
| Milagros                          | Carrasco Prats    |                       | MD, PhD          | Unit of Oncologic Surgery, University General Hospital Reina Sofia                                                                                                | Murcia, Spain                            |                                                         |                                                                                            |

## Supplemental Online Content: Nonauthor Collaborators

\*Indicates required information. Only first name, last name, and suffix will appear in PubMed.

| *First Name and Middle Initial(s) | *Last Name      | *Suffix (eg, Jr, III) | Academic Degrees | Institution                                                                                                                                                                                   | Location (city, state/province, country) | Role or Contribution, eg, chair, principal investigator | Group (if more than 1 Group listed in the byline) and/or Subgroup (eg, Steering Committee) |
|-----------------------------------|-----------------|-----------------------|------------------|-----------------------------------------------------------------------------------------------------------------------------------------------------------------------------------------------|------------------------------------------|---------------------------------------------------------|--------------------------------------------------------------------------------------------|
| Miguel                            | Ruíz Marín      |                       | MD               | Unit of Oncologic Surgery, University General Hospital Reina Sofia                                                                                                                            | Murcia, Spain                            |                                                         |                                                                                            |
| Emilio                            | Terol Garaulet  |                       | MD               | Unit of Oncologic Surgery, University General Hospital Reina Sofia                                                                                                                            | Murcia, Spain                            |                                                         |                                                                                            |
| Francisco                         | García Molina   |                       | MD               | Unit of Pathology, University General Hospital Reina Sofia                                                                                                                                    | Murcia, Spain                            |                                                         |                                                                                            |
| Rafael                            | Morales Soriano |                       | MD, PhD          | General and Digestive Surgery Department, University Hospital Son Espases; School of Medicine, University of the Balearic Islands; Health Research Institute of the Balearic Islands (IDISBA) | Palma de Mallorca, Spain                 |                                                         |                                                                                            |
| Cristina                          | Pineño Flores   |                       | MD, PhD          | General and Digestive Surgery Department, University Hospital Son Espases; School of Medicine, University of the Balearic Islands; Health Research Institute of the Balearic Islands (IDISBA) | Palma de Mallorca, Spain                 |                                                         |                                                                                            |
| Raquel                            | Pérez Rodríguez |                       | PhD              | Analytics, Hospital University Nuestra Señora de la Candelaria                                                                                                                                | Tenerife, Spain                          |                                                         |                                                                                            |
| Carolina                          | Hernández Pérez |                       | MD               | Unit of Oncology, Hospital University Nuestra Señora de la Candelaria                                                                                                                         | Tenerife, Spain                          |                                                         |                                                                                            |
| Ruth                              | Afonso Gómez    |                       | MD               | Unit of Oncology, Hospital University Nuestra Señora de la Candelaria                                                                                                                         | Tenerife, Spain                          |                                                         |                                                                                            |
| María Micaela                     | Viña Romero     |                       | MD               | Pharmacy, Hospital University Nuestra Señora de la Candelaria                                                                                                                                 | Tenerife, Spain                          |                                                         |                                                                                            |

## Supplemental Online Content: Nonauthor Collaborators

\*Indicates required information. Only first name, last name, and suffix will appear in PubMed.

| *First Name and Middle Initial(s) | *Last Name             | *Suffix (eg, Jr, III) | Academic Degrees | Institution                                                                                                      | Location (city, state/province, country) | Role or Contribution, eg, chair, principal investigator | Group (if more than 1 Group listed in the byline) and/or Subgroup (eg, Steering Committee) |
|-----------------------------------|------------------------|-----------------------|------------------|------------------------------------------------------------------------------------------------------------------|------------------------------------------|---------------------------------------------------------|--------------------------------------------------------------------------------------------|
| Amelia                            | Muñoz Hernández        |                       | MD               | Unit of Radiology, Hospital University Nuestra Señora de la                                                      | Tenerife, Spain                          |                                                         |                                                                                            |
| Victoria                          | Castro López-Tarruella |                       | MD               | Unit of Pathology, Hospital University Nuestra Señora de la                                                      | Tenerife, Spain                          |                                                         |                                                                                            |
| Modesto E.                        | Moneva Arce            |                       | MD               | Unit of Peritoneal Oncologic Surgery and Colorectal Surgery, Hospital University Nuestra Señora de la Candelaria | Tenerife, Spain                          |                                                         |                                                                                            |
| Rajesh                            | Gianchandani Moorjani  |                       | MD               | Unit of Peritoneal Oncologic Surgery and Colorectal Surgery, Hospital University Nuestra Señora de la Candelaria | Tenerife, Spain                          |                                                         |                                                                                            |
| Juan M.                           | Sánchez González       |                       | MD               | Unit of Peritoneal Oncologic Surgery and Colorectal Surgery, Hospital University Nuestra Señora de la Candelaria | Tenerife, Spain                          |                                                         |                                                                                            |
| Carmen                            | Díaz López             |                       | MD               | Unit of Peritoneal Oncologic Surgery and Colorectal Surgery, Hospital University Nuestra Señora de la Candelaria | Tenerife, Spain                          |                                                         |                                                                                            |
| Guillermo                         | Hernández Hernández    |                       | MD               | Unit of Peritoneal Oncologic Surgery and Colorectal Surgery, Hospital University Nuestra Señora de la Candelaria | Tenerife, Spain                          |                                                         |                                                                                            |
| José G.                           | Díaz Mejías            |                       | MD               | Unit of Peritoneal Oncologic Surgery and Colorectal Surgery, Hospital University Nuestra Señora de la Candelaria | Tenerife, Spain                          |                                                         |                                                                                            |

Supplemental Online Content: Nonauthor Collaborators

\*Indicates required information. Only first name, last name, and suffix will appear in PubMed.

| <b>*First Name and Middle Initial(s)</b> | <b>*Last Name</b> | <b>*Suffix (eg, Jr, III)</b> | Academic Degrees | Institution                                                                                                      | Location (city, state/province, country) | Role or Contribution, eg, chair, principal investigator | Group (if more than 1 Group listed in the byline) and/or Subgroup (eg, Steering Committee) |
|------------------------------------------|-------------------|------------------------------|------------------|------------------------------------------------------------------------------------------------------------------|------------------------------------------|---------------------------------------------------------|--------------------------------------------------------------------------------------------|
| Moisés J.                                | Hernández Barroso |                              | MD               | Unit of Peritoneal Oncologic Surgery and Colorectal Surgery, Hospital University Nuestra Señora de la Candelaria | Tenerife, Spain                          |                                                         |                                                                                            |
|                                          | Abreu Falcon      |                              | MD               | Unit of Peritoneal Oncologic Surgery and Colorectal Surgery, Hospital University Nuestra Señora de la Candelaria | Tenerife, Spain                          |                                                         |                                                                                            |
