# Supplementary material
Source: PubMed Central journal article supplement (PMC10134040)
Supplement: jamasurg-e230662-s004.pdf [file jamasurg-e230662-s004.pdf]

## Data Sharing Statement

Arjona-Sánchez. Efficacy and Safety of Intraoperative Hyperthermic Intraperitoneal Chemotherapy for Locally Advanced Colon Cancer. *JAMA Surg.* Published April 26, 2023. doi:10.1001/jamasurg.2023.0662

### Data

**Data available:** Yes

**Data types:** Other (please specify)

**Additional Information:** Data will be available requesting to corresponding author for scientific proposals

**How to access data:** Deidentified participant data

**When available:** With publication

### Supporting Documents

**Document types:** Other (please specify)

**Additional Information:** I attach the complete trial protocol (Spanish version) and a summary in english version. I attach the clinicaltrial.gov website with the trial registration.

<https://clinicaltrials.gov/ct2/show/NCT02614534?term=hipect4&draw=2&rank=1>

<https://drive.google.com/drive/folders/1-hHTj8IUyfG1x3kLUeyHfJuH4KbRgGZS?usp=sharing>

**How to access documents:** I attach the complete trial protocol (Spanish version) and a summary in english version. I attach the clinicaltrial.gov website with the trial registration.

<https://clinicaltrials.gov/ct2/show/NCT02614534?term=hipect4&draw=2&rank=1>

<https://drive.google.com/drive/folders/1-hHTj8IUyfG1x3kLUeyHfJuH4KbRgGZS?usp=sharing>

**When available:** With publication

### Additional Information

**Who can access the data:** researchers whose proposed use of the data has been approved

**Types of analyses:** for scientific proposals

**Mechanisms of data availability:** with investigator support, after approval of a proposal and with a signed data access agreement.
